# Supplementary material for: A unique zinc-organic framework constructed through in situ ligand synthesis for conversion of CO2under mild conditions and as a luminescence sensor for Cr2O72−/CrO42−
Source: Royal Society of Chemistry journal article supplement (doi:10.1039/c7dt02819a), 2017-01-01
Supplement: c7dt02819a1.pdf [file c7dt02819a1.pdf]

*Electronic supplementary information*

**A unique zinc-organic framework constructed through *in situ* ligand synthesis for conversion of CO<sub>2</sub> under mild conditions and as a luminescent sensor for Cr<sub>2</sub>O<sub>7</sub><sup>2-</sup>/CrO<sub>4</sub><sup>2-</sup>**

Tian-Qun Song,<sup>a</sup> Jie Dong,<sup>b</sup> Hong-Ling Gao,<sup>a</sup> Jian-Zhong Cui,<sup>\*a</sup> Bin Zhao<sup>\*b</sup>

*a. Department of Chemistry, National Demonstration Center for Experimental Chemistry & Chemical engineering Education, National Virtual Simulation Experimental Teaching Center for Chemistry & Chemical engineering Education, Tianjin University, Tianjin 300072, P. R. China*

*b. Department of Chemistry, Nankai University, Tianjin 300071, P. R. China*

E-mail: cuijianzhong@tju.edu.cn and zhaobin@nankai.edu.cn

**List of Contents**

**Supplementary Experimental Section**

**Table S1.** Selected bond lengths (Å) and bond angles (°) for compound **1**.

**Table S2.** Hydrogen bonding data for **1**.

**Figure S1.** The FT-IR spectra of compound **1** and after catalytic recyclings.

**Figure S2.** The PXRD patterns for the simulated and as-synthesized samples for **1** (a); The PXRD patterns for **1** immersing in common organic solvents (b); The PXRD patterns for **1** in various pH values solutions from 1.0 to 14.0 (c).

**Figure S3.** TG curve for compound **1**.

**Figure S4.** The PXRD patterns of **1** after six catalytic recyclings and simulated one from **1**.

**Figure S5.** CO<sub>2</sub> isotherm of **1** at 273 K.

**Figure S6.** The possible mechanism for the cycloaddition reaction with epoxides and CO<sub>2</sub>.

**Figure S7.** The emission spectrum of **1** ( $\lambda_{\text{excited}} = 270 \text{ nm}$ ).

**Figure S8.** The luminescence intensity of **1**-Cr<sub>2</sub>O<sub>7</sub><sup>2-</sup> (a) and **1**-CrO<sub>4</sub><sup>2-</sup> (b) under mixed anions.

**Figure S9.** The PXRD patterns of **1** after luminescent recycling and simulated one from **1**.

**Figure S10.** The UV-vis spectra of the K<sub>2</sub>Cr<sub>2</sub>O<sub>7</sub> and K<sub>2</sub>CrO<sub>4</sub> solutions.

**Table S3.** The ICP results of **1** after catalytic recyclings (filter liquor) and luminescent recyclings (soild sample), respectively.

**Table S1.** Selected bond lengths (Å) and bond angles (°) for compound **1**.

| <i>Bond distances</i> |          |                |           |
|-----------------------|----------|----------------|-----------|
| Zn1-O4                | 2.071(5) | Zn2-N1         | 2.046 (7) |
| Zn1-O4#2              | 2.222(6) | Zn2-O3#1       | 1.915(6)  |
| Zn1-O7#2              | 2.222(6) | Zn2-O3         | 1.922(5)  |
| Zn1-O7                | 2.086(7) | Zn2#3-O3       | 1.915(5)  |
| Zn1-N11               | 2.086(7) | Zn2-O5         | 1.997(6)  |
| <i>Angles</i>         |          |                |           |
| O4#2-Zn1-O4           | 180.0(4) | O3#1-Zn2-N1    | 101.2(3)  |
| O4#2-Zn1-O7#2         | 90.8(2)  | O3-Zn2-N1      | 108.5(3)  |
| O4-Zn1-O4#2           | 89.2(2)  | O3-Zn2- O3#1   | 116.6(2)  |
| O4-Zn1-N11            | 87.4(2)  | O5-Zn2- O3#1   | 107.4(2)  |
| O4-Zn1-N11#2          | 92.6(2)  | O3-Zn2-O5      | 118.6(2)  |
| O4#2-Zn1-N11#2        | 87.4(2)  | O5-Zn2-N1      | 102.1(3)  |
| O7-Zn1-O7#2           | 180.0(3) | N8-Zn1-N1      | 127.3(6)  |
| N11-Zn1-O7#2          | 89.5(3)  | C12-Zn2-N1     | 126.6(5)  |
| N11-Zn1-O7            | 90.5(3)  | Zn2-O3-Zn2#3   | 127.4(3)  |
| C1-O4-Zn1             | 133.6(6) | C1-O5-Zn2      | 112.8(5)  |
| N9-N11-Zn1            | 126.8(5) | N11-Zn1- C12#5 | 125.3(6)  |

#1 +X, 1/2-Y, 1/2+Z; #2 -X, -Y, -Z, #3 +X, 1/2-Y, -1/2+Z; #4 1-X, 1/2+Y, 1/2-Z; #5 1-X, -1/2+Y, 1/2-Z

**Table S2.** Hydrogen bonding data for compound **1**.

| D-H...A           | d(D-H) (Å) | d(H...A) (Å) | d(D...A) (Å) | D-H...A (°) |
|-------------------|------------|--------------|--------------|-------------|
| O(7)-H(7A)-O(5)   | 0.90       | 2.54         | 3.0759       | 118         |
| O(7)-H(7B)-N(8)   | 0.85       | 2.04         | 2.8839       | 176         |
| C(13)-H(13B)-O(5) | 0.97       | 2.37         | 3.3380       | 176         |

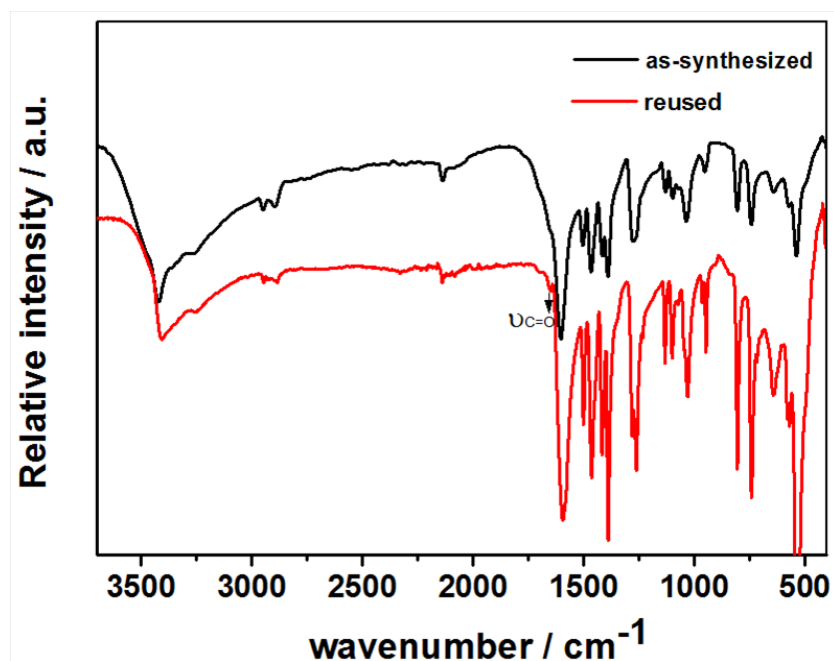**Figure S1.** The FT-IR spectra of compound **1** and after catalytic recyclings.

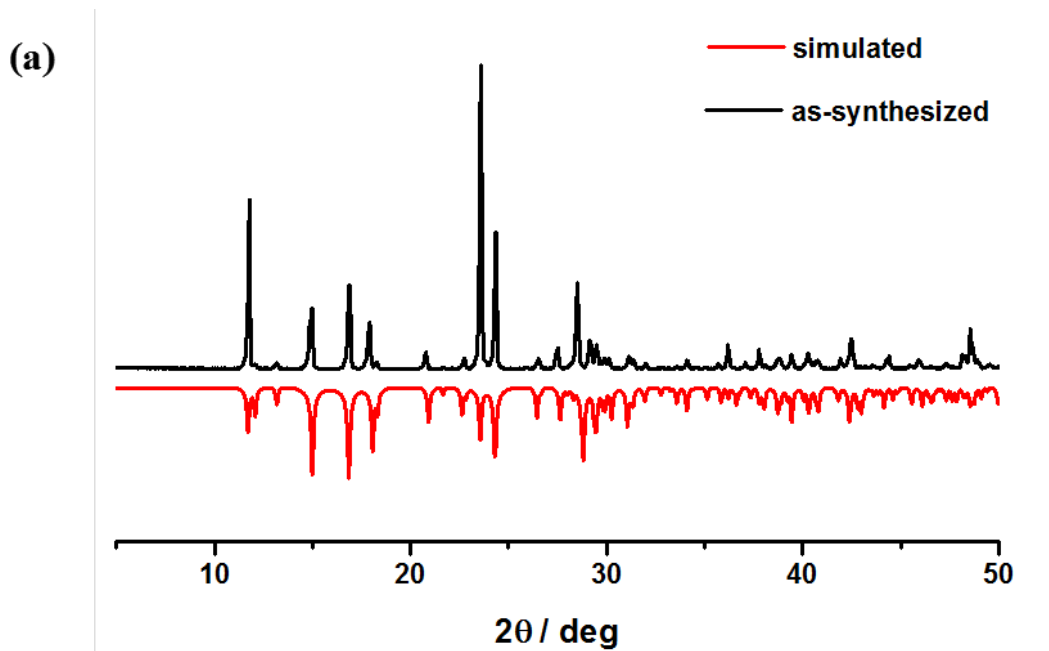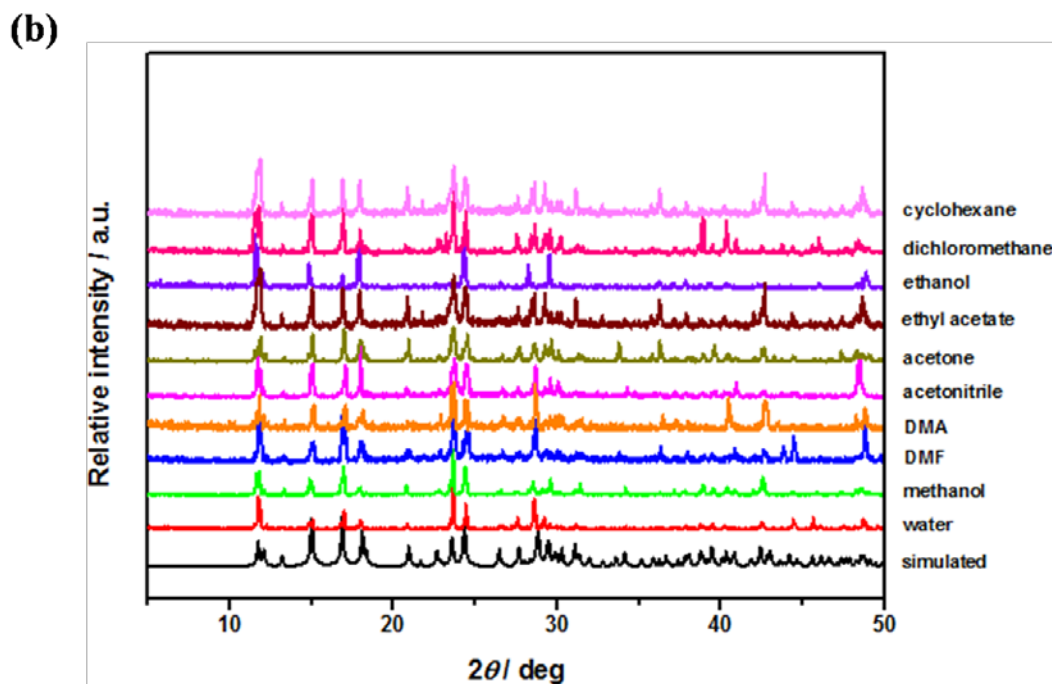

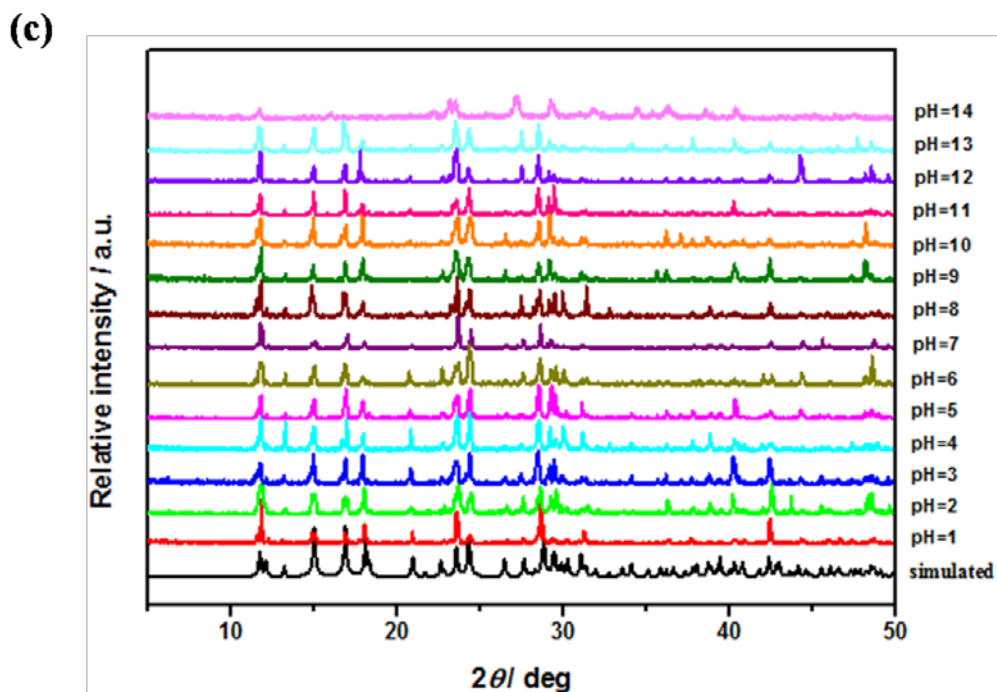

**Figure S2.** (a) The PXRD patterns for the simulated and as-synthesized samples for **1**; (b) The PXRD patterns for **1** immersing in common organic solvents; (c) The PXRD patterns for **1** in various pH values solutions from 1.0 to 14.0.

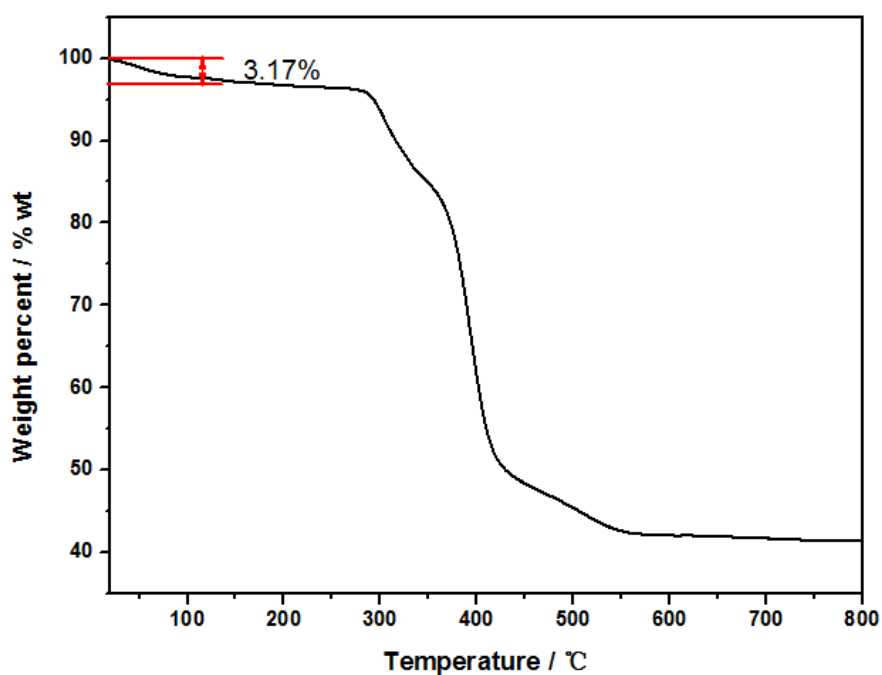

**Figure S3.** TG curve for compound **1**.

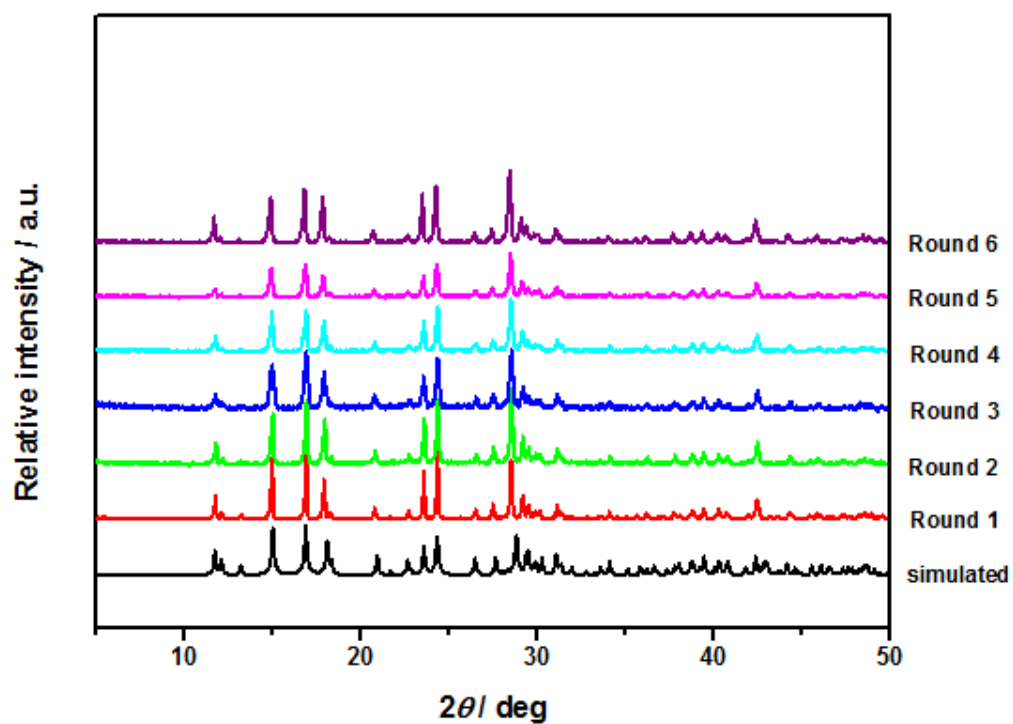

Figure S4. The PXRD patterns of **1** after catalytic recyclings and simulated one from **1**.

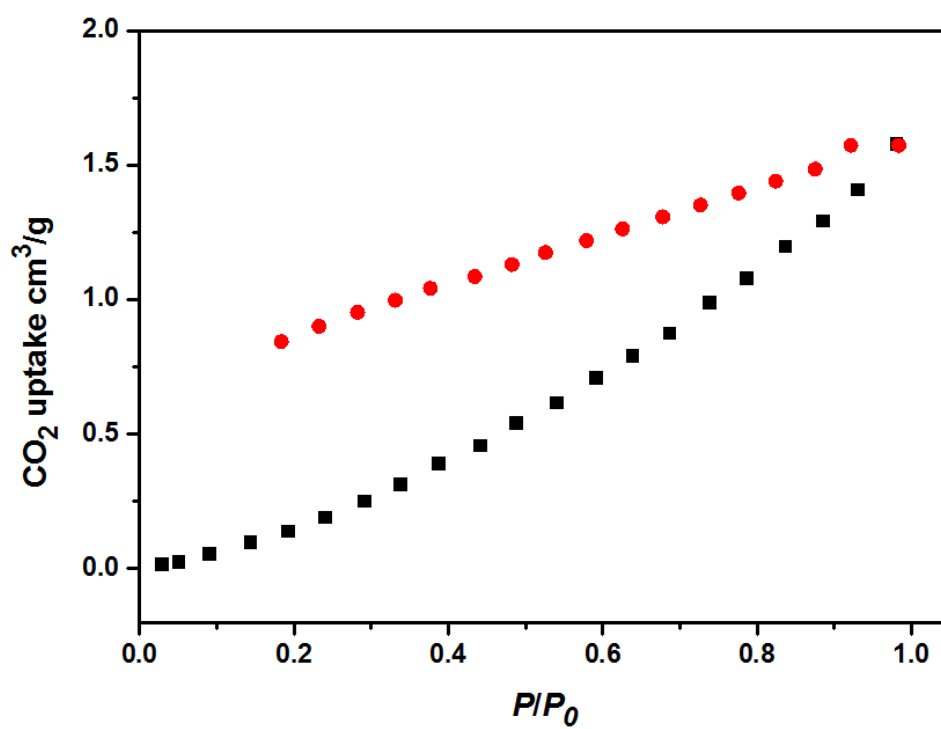

Figure S5. CO<sub>2</sub> isotherm of **1** at 273 K.

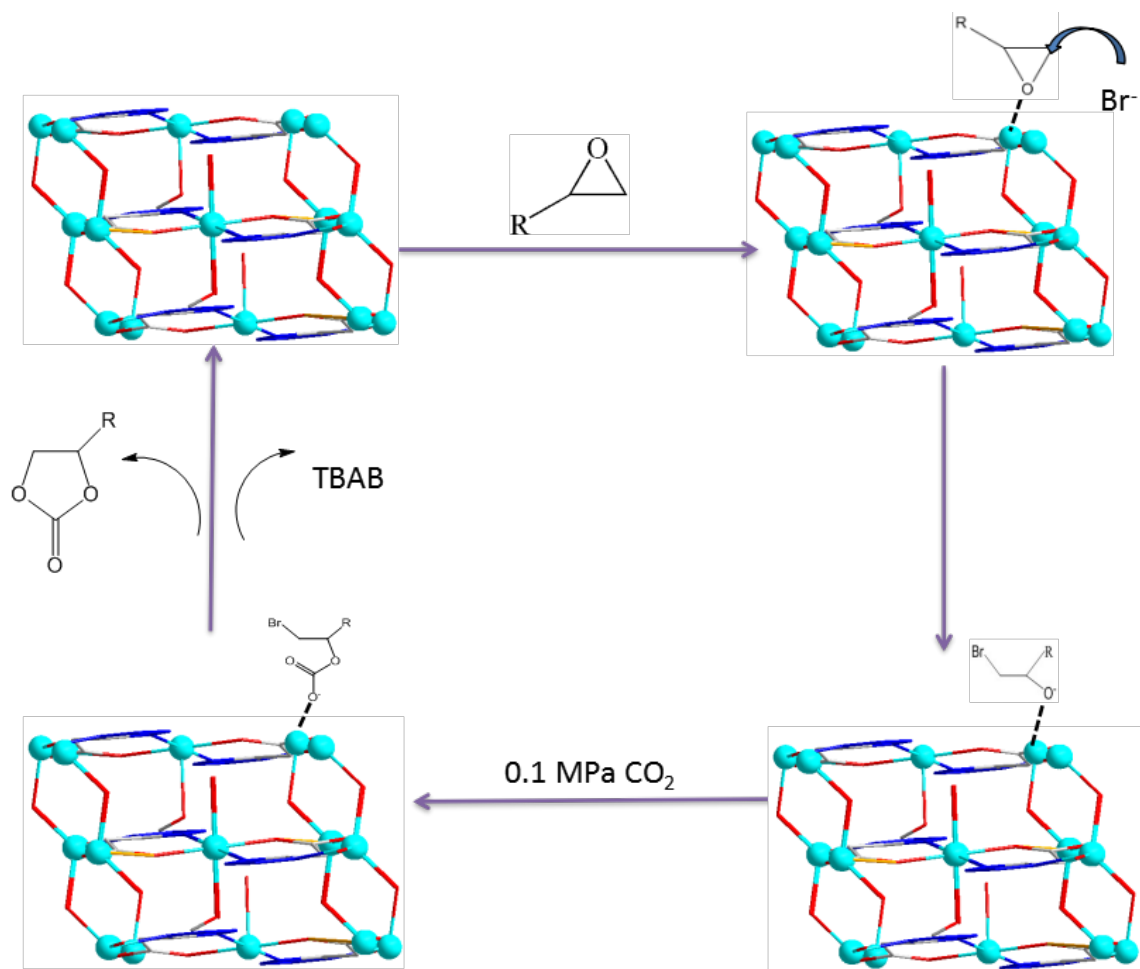

**Figure S6.** The possible mechanism for the cycloaddition reaction with epoxides and CO<sub>2</sub> into cyclic carbonates.

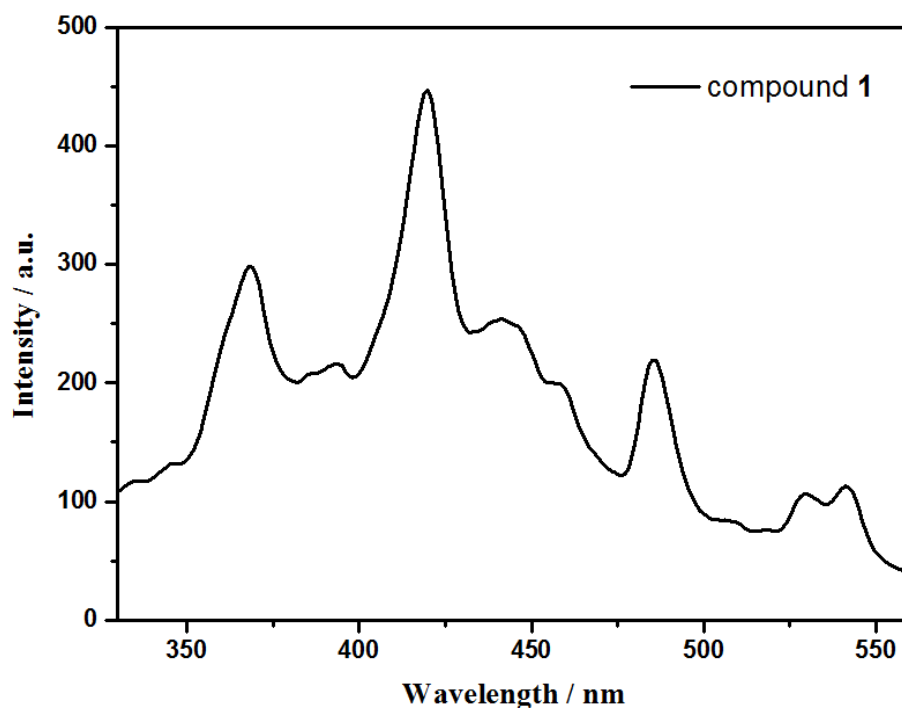

**Figure S7.** The emission spectrum of **1** ( $\lambda_{\text{excited}} = 270$  nm).

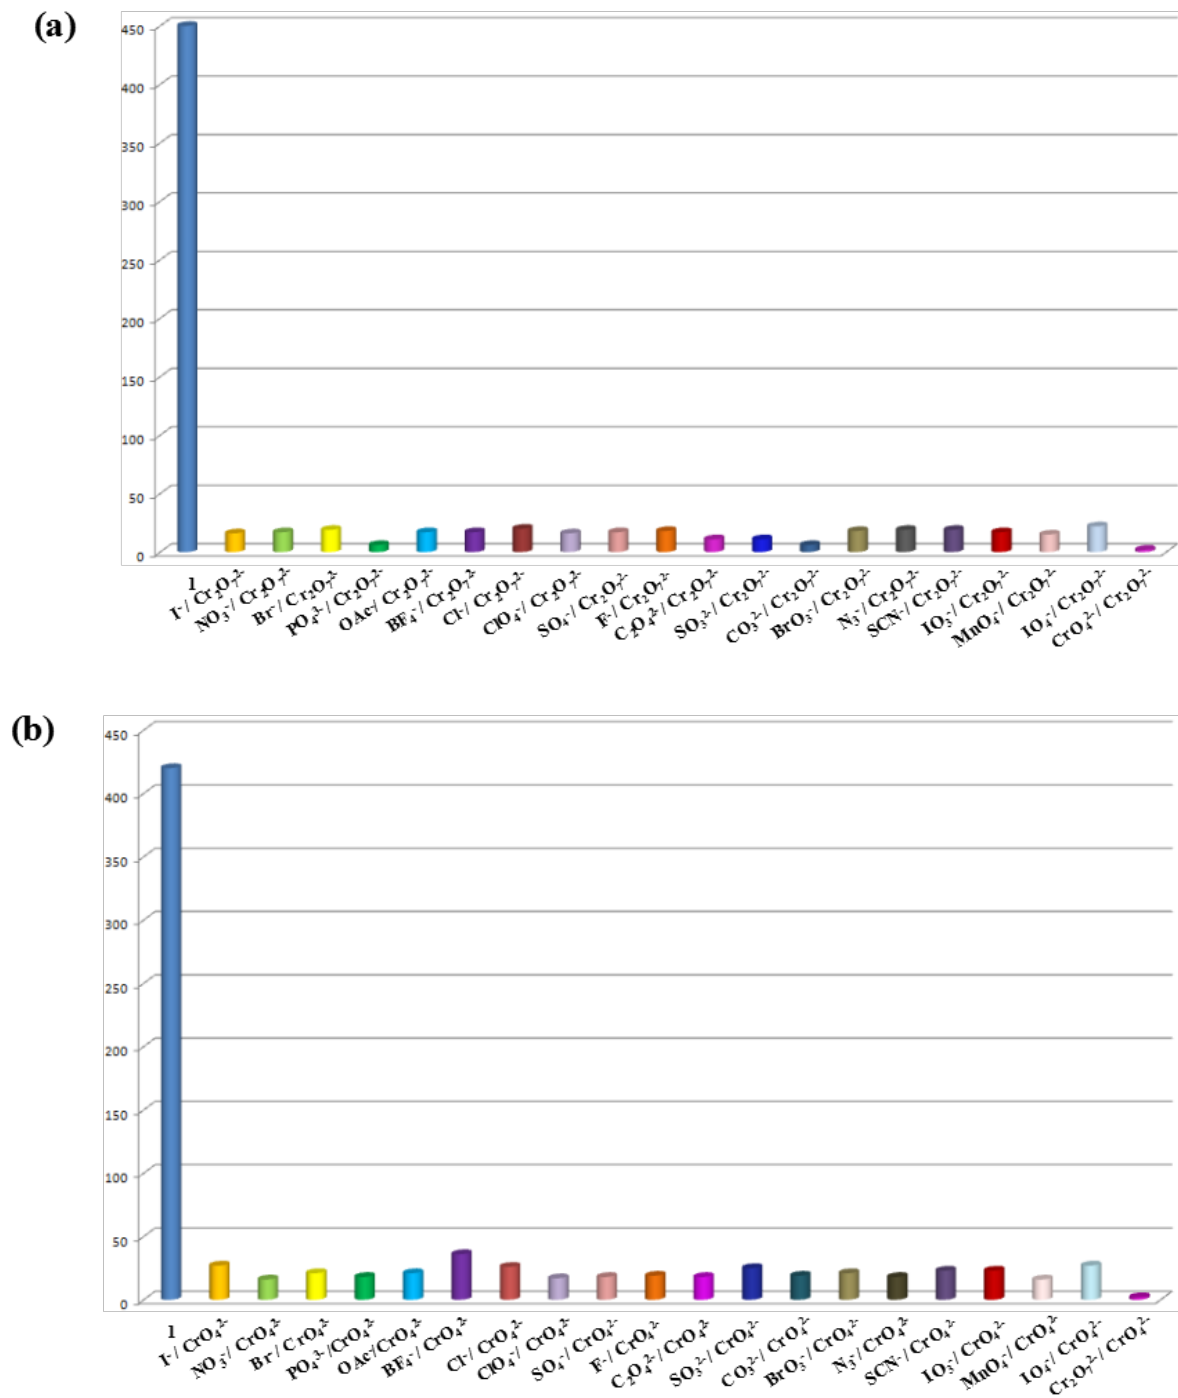

**Figure S8.** The luminescence intensity of **1**-Cr<sub>2</sub>O<sub>7</sub><sup>2-</sup> (a) and **1**-CrO<sub>4</sub><sup>2-</sup> (b) under mixed anions.

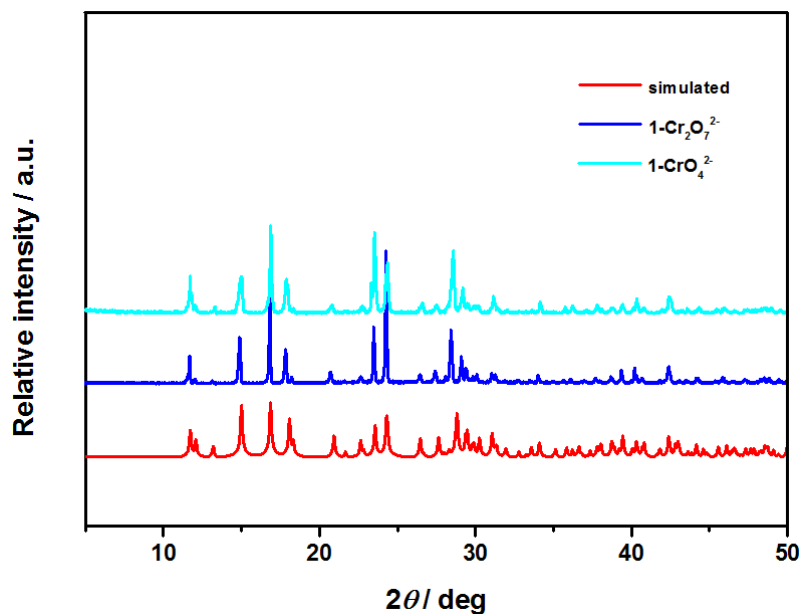

**Figure S9.** The PXRD patterns of **1** after luminescent recycling and simulated one from **1**.

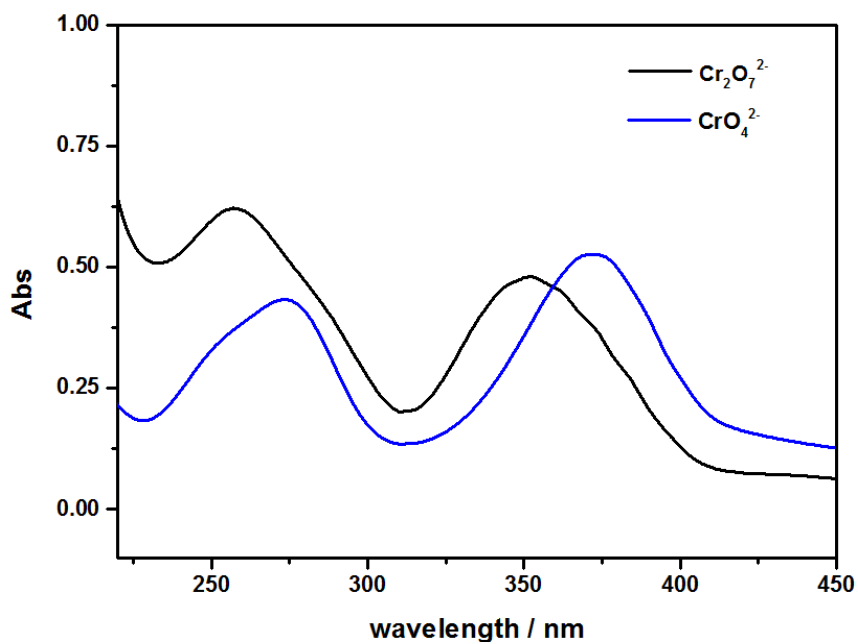

**Figure S10.** The UV-vis spectra of the  $\text{K}_2\text{Cr}_2\text{O}_7$  and  $\text{K}_2\text{CrO}_4$  solutions.

**Table S3.** The ICP results of **1** after catalytic recyclings (filter liquor) and luminescent recyclings (soild sample), respectively.

|                                                                                                                     | Compound <b>1</b>                   |
|---------------------------------------------------------------------------------------------------------------------|-------------------------------------|
| <b>1</b> after catalytic recyclings<br>( $\text{Zn}^{2+}$ of filter liquor)                                         | 0.69 ppm                            |
| <b>1</b> as $\text{Cr}_2\text{O}_7^{2-}$ sensor after luminescent<br>recyclings ( $\text{Cr}^{6+}$ of soild sample) | below detectable limit (0.0069 ppm) |
| <b>1</b> as $\text{CrO}_4^{2-}$ sensor after luminescent<br>recyclings ( $\text{Cr}^{6+}$ of soild sample)          | below detectable limit (0.0039 ppm) |
